# Supplementary material for: miR-223-3p Inhibits Human Osteosarcoma Metastasis and Progression by Directly Targeting CDH6
Source: PubMed Central journal article supplement — Mol Ther. 2018 Mar 14;26(5):1299–312. doi: 10.1016/j.ymthe.2018.03.009 (PMC5993963; doi:10.1016/j.ymthe.2018.03.009), 2018-03-14
Supplement: mmc1.pdf [file mmc1.pdf]

**YMTHE, Volume 26**

## **Supplemental Information**

**miR-223-3p Inhibits Human Osteosarcoma**

**Metastasis and Progression by Directly**

**Targeting CDH6**

**Quanbo Ji, Xiaojie Xu, Qi Song, Yameng Xu, Yanhong Tai, Stuart B. Goodman, Wenzhi Bi, Meng Xu, Shunchang Jiao, William J. Maloney, and Yan Wang**

**Figure S1**

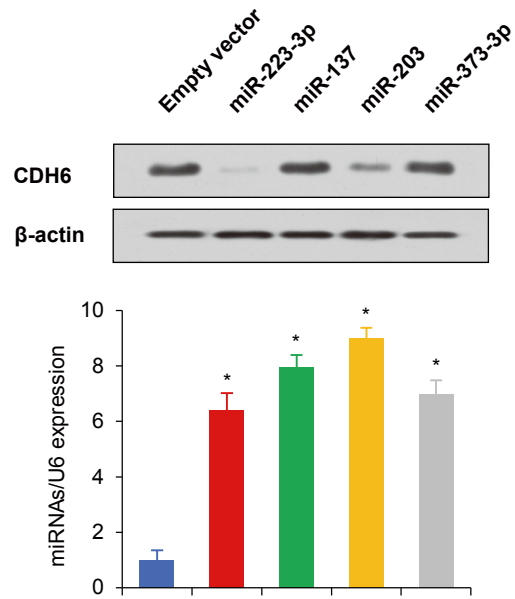

**Figure S1. Screening for potential CDH6-targeting miRNAs.** Immunoblot analysis of the 143B cells transfected with empty vector, miR-223-3p, miR-137, miR-203, or miR-373-3p. Histograms under the immunoblot graphs show corresponding expression levels of miRNAs by qRT-PCR. \* $p < 0.05$  and \*\* $p < 0.01$ .

## Figure S2

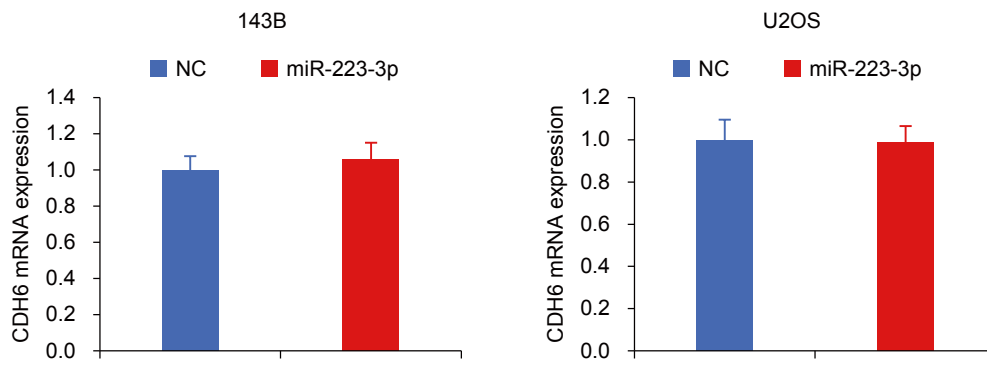

**Figure S2. miR-223-3p regulates CDH6 expression in a posttranscriptional way.** Analysis of 143B, U2OS cells transfected with scramble or miR-223-3p mimics. The corresponding miRNA expression was determined using qRT-PCR. Each bar represents the mean of at least three independent experiments performed in triplicate  $\pm$  standard deviation. \* $p < 0.05$  and \*\* $p < 0.01$ .

## Figure S3

**A**

| Target gene | ResfSeq Id   |
|-------------|--------------|
| PAX5        | NM_016734    |
| CDH6        | NM_004932    |
| EYA3        | NM_001990    |
| SOX11       | NM_003108    |
| HDAC4       | NM_006037    |
| TET3        | NM_001287491 |

**B**

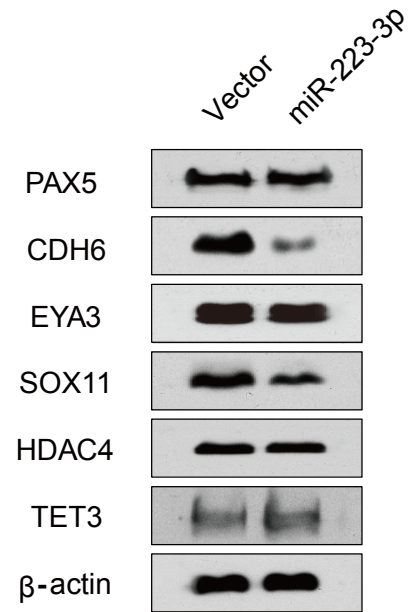

**Figure S3. Potential target genes of miR-223-3p screened.** (A) Candidate target genes of miR-223-3p were found using publicly available databases (TargetScan and miRanda). (B) Immunoblot analysis showing the expression of the candidate target genes in 143B cells transfected with miR-223-3p.

## Figure S4

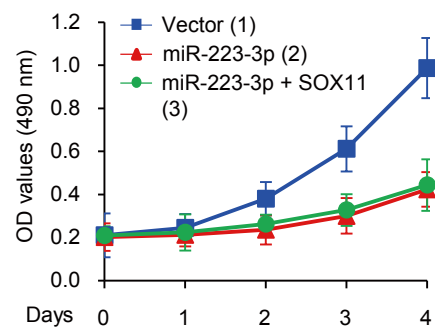

**Figure S4. miR-223-3p inhibits osteosarcoma cell growth but not through the suppression of SOX11.** 143B cells expressing miR-223-3p or miR-223-3p and SOX11 were cultured in regular medium. At the specified times, cell numbers were determined with the CCK-8 assay.

## Figure S5

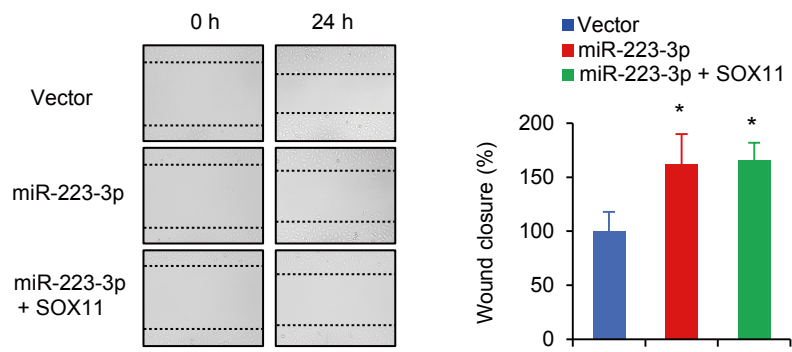

**Figure S5. miR-223-3p inhibits osteosarcoma cell migration but not through the suppression of SOX11.** Wound healing assays were conducted in 143B cells transfected with miR-223-3p or miR-223-3p and SOX11. Each bar represents the mean  $\pm$  standard deviation of at least three independent experiments performed in triplicate. \* $p < 0.05$ , \*\* $p < 0.01$ .

**Table S1** Clinicopathological characteristics of osteosarcoma patients

| <b>Characteristics</b> | <b>n (%) *Median (range)</b> |
|------------------------|------------------------------|
| Age                    | 17.28 (8.16-17.39)*          |
| Gender                 |                              |
| Male                   | 76 (57.1%)                   |
| Female                 | 57 (42.9%)                   |
| Tumor size (cm)        |                              |
| > 7                    | 69 (51.9%)                   |
| ≤ 7                    | 64 (48.1%)                   |
| Location               |                              |
| Distal femur           | 57 (42.9%)                   |
| Proximal tibia         | 34 (25.6%)                   |
| Proximal humerus       | 26 (19.5%)                   |
| Proximal femur         | 11 (8.2%)                    |
| Others                 | 5 (3.8%)                     |
| TNM Stage              |                              |
| I                      | 57 (42.9%)                   |
| II/III                 | 76 (57.1%)                   |
| Relapse                |                              |
| Yes                    | 26 (19.5%)                   |
| No                     | 107 (80.5%)                  |
| Metastasis             |                              |
| Lung                   | 49 (36.9%)                   |
| Others                 | 16 (12.0%)                   |
| No                     | 68 (51.1%)                   |

**Table S2** Primer sequences of Oligonucleotides

| <b>Name</b>                                               | <b>Forward (5'→3')</b>   | <b>Reverse (5'→3')</b>    |
|-----------------------------------------------------------|--------------------------|---------------------------|
| <b>Primer sequences for real-time quantitative RT-PCR</b> |                          |                           |
| <b>CDH6</b>                                               | AAGGAGGTTTACACAGCCACTGT  | CTTGGTACTGCTCCCTGTTTTCT   |
| <b>β-actin</b>                                            | ATCACCATTGGCAATGAGCG     | TTGAAGGTAGTTTCGTGGAT      |
| <b>Primers sequences for PCR</b>                          |                          |                           |
| <b>CDH6 3'UTR</b>                                         | TCTGTTGCCTTTTTCATTTCCAA  | TTAGAAAAAAACCAGTTTATTAAGT |
| <b>CDH6 3'UTR Mut</b>                                     | ATGCACATAAATAAACCCAGTCAC | GTGACTGGTTTATTTATGTGCAT   |
| <b>CDH6</b>                                               | ATGAGAACTTACCGCTACTTCTTG | TTAGGAGTCTTTGTCACTGTCCA   |
